# Supplementary material for: Complete Mitochondrial Genome Sequence of Three Tetrahymena Species Reveals Mutation Hot Spots and Accelerated Nonsynonymous Substitutions in Ymf Genes
Source: PLOS journal article supplement (doi:10.1371/journal.pone.0000650), 2007-07-24
Supplement: S4 (10.1371/journal.pone.0000650.s004) [file journal.pone.0000650.s004]

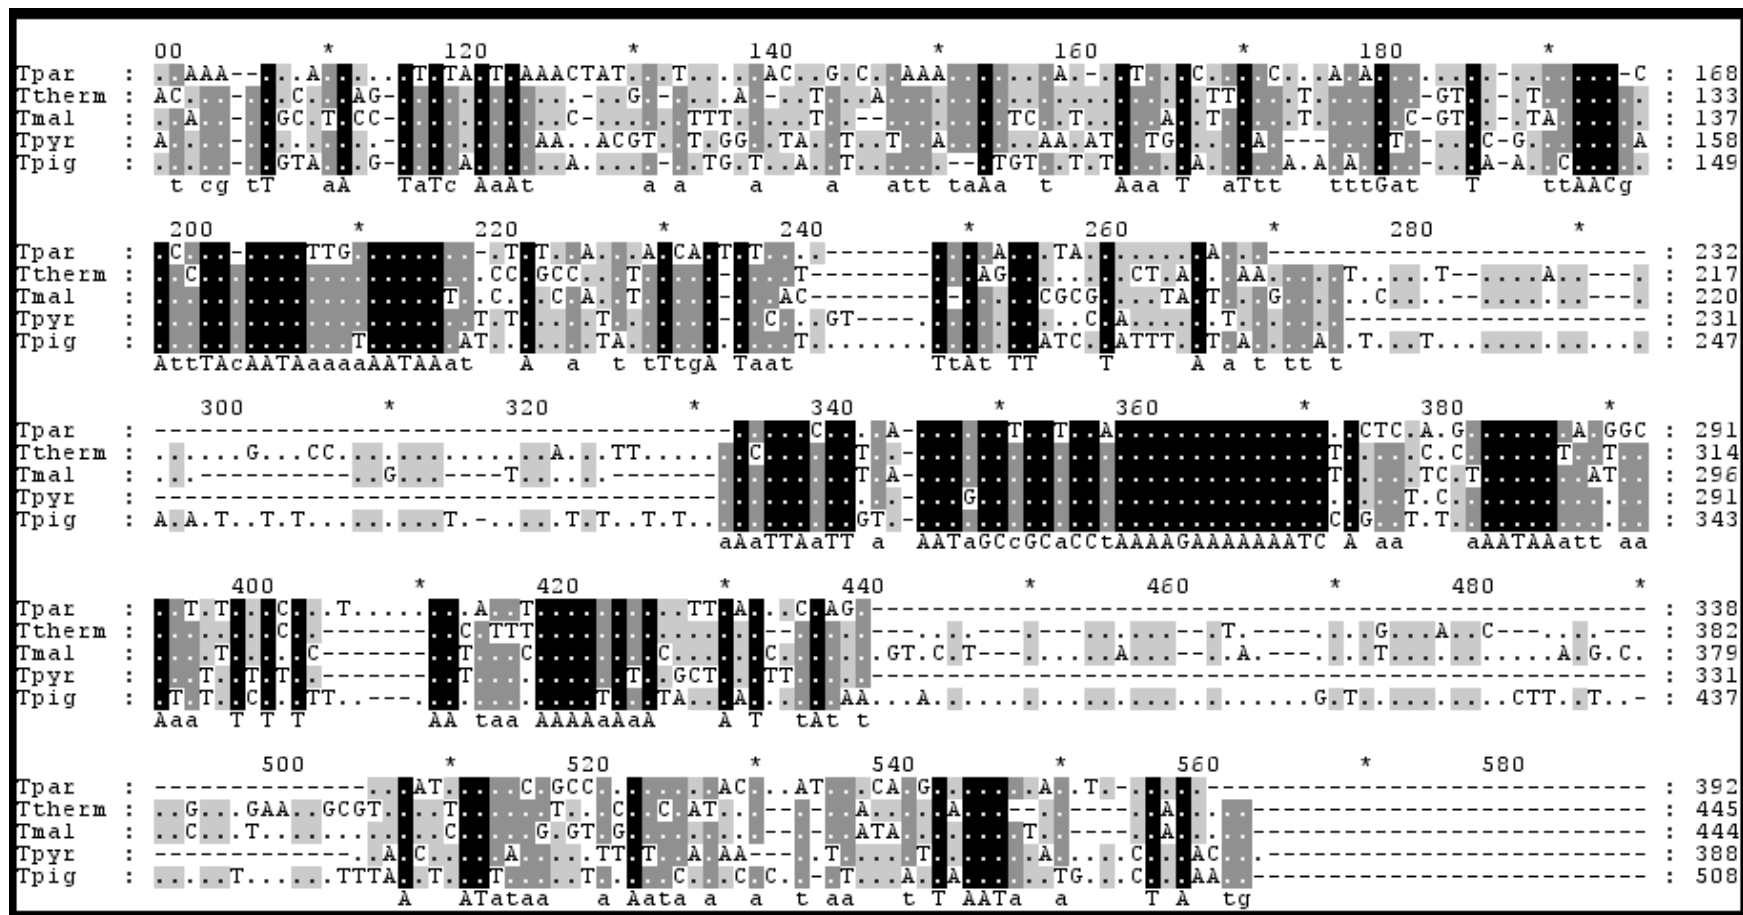

Figure S2- GeneDoc Nucleotide alignment of the cob and ymf77 intergenic region.

Sequences between position 345-371 represent the conserved region with the transcription control GC sequence starting at position 349. Alignment of flanking regions are shown for comparison.
