# Supplementary material for: Complete Mitochondrial Genome Sequence of Three Tetrahymena Species Reveals Mutation Hot Spots and Accelerated Nonsynonymous Substitutions in Ymf Genes
Source: PLOS journal article supplement (doi:10.1371/journal.pone.0000650), 2007-07-24
Supplement: S7 (10.1371/journal.pone.0000650.s007) [file journal.pone.0000650.s007]

### dn/ds vs. Rad/Cons Ratio Correlation in Ymfs

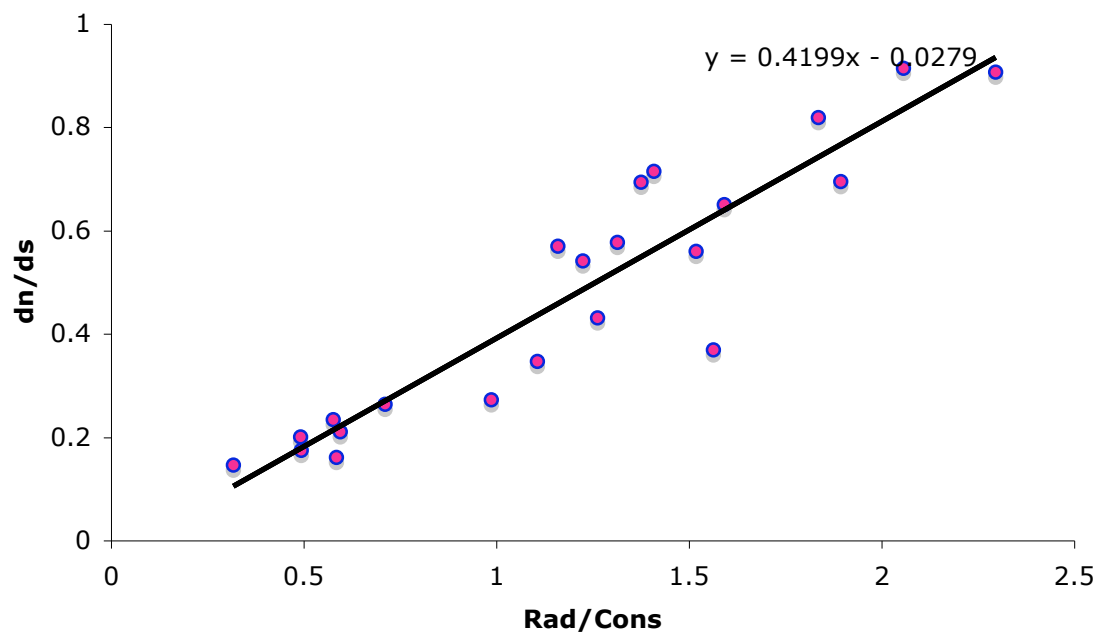

Figure S5- Correlation graph for dn/ds vs. Rad/Cons ratios for Ymf genes.

Each point is based on average pairwise comparison of Ymf genes.  
Total of 10 comparisons per orthologous gene using five mt genomes.
